# Supplementary material
Source: MDPI journal article supplement (https://www.mdpi.com/2075-163X/10/1/47)
Supplement: s1 [file s1]

**Table S1.** EDX point analyses on garnet standard.

| <b>Garnet standard 138</b>             |                        |              |                                    |                        |                       |             |                        |                                    |             |              |            |
|----------------------------------------|------------------------|--------------|------------------------------------|------------------------|-----------------------|-------------|------------------------|------------------------------------|-------------|--------------|------------|
| Accepted values                        |                        |              |                                    |                        |                       |             |                        |                                    |             |              |            |
|                                        | <b>Na<sub>2</sub>O</b> | <b>MgO</b>   | <b>Al<sub>2</sub>O<sub>3</sub></b> | <b>SiO<sub>2</sub></b> | <b>K<sub>2</sub>O</b> | <b>CaO</b>  | <b>TiO<sub>2</sub></b> | <b>Cr<sub>2</sub>O<sub>3</sub></b> | <b>MnO</b>  | <b>FeO</b>   | <b>NiO</b> |
|                                        | 0.01                   | 19.68        | 23.47                              | 42.2                   | 0.01                  | 4.33        | 0.02                   | 0.4                                | 0.5         | 9.63         | 0.02       |
| $\pm 2SD$ ( <i>abs</i> )               | 0.02                   | 0.34         | 0.39                               | 0.33                   | 0.02                  | 0.26        | 0.04                   | 0.12                               | 0.12        | 0.42         | 0.04       |
| EDX point measurements (Bruker Esprit) |                        |              |                                    |                        |                       |             |                        |                                    |             |              |            |
|                                        |                        | 19.55        | 23.06                              | 40.9                   |                       | 4.78        |                        |                                    | 0.34        | 11.38        |            |
|                                        |                        | 19.8         | 23.46                              | 40.88                  |                       | 4.9         |                        |                                    | 0.39        | 10.56        |            |
|                                        |                        | 19.96        | 23.12                              | 41.2                   |                       | 5.06        |                        |                                    | 0.51        | 10.15        |            |
|                                        |                        | 20.25        | 23.39                              | 41.29                  |                       | 4.86        |                        |                                    | 0.47        | 9.9          |            |
|                                        |                        | 19.42        | 23.30                              | 41.40                  |                       | 4.36        |                        |                                    | 0.58        | 10.93        |            |
|                                        |                        | 19.90        | 23.44                              | 41.15                  |                       | 4.81        |                        |                                    | 0.38        | 10.34        |            |
|                                        |                        | 19.87        | 23.65                              | 41.24                  |                       | 5.26        |                        |                                    | 0.43        | 9.55         |            |
|                                        |                        | 20.21        | 23.32                              | 41.12                  |                       | 4.50        |                        |                                    | 0.42        | 10.44        |            |
| <b>Mean</b>                            |                        | <b>19.87</b> | <b>23.34</b>                       | <b>41.15</b>           |                       | <b>4.82</b> |                        |                                    | <b>0.44</b> | <b>10.41</b> |            |
