# Supplementary material
Source: MDPI journal article supplement (https://www.mdpi.com/2075-163X/10/1/47)
Supplement: s1 [file s1]

Outcrop and handspecimen images, mineral composition data

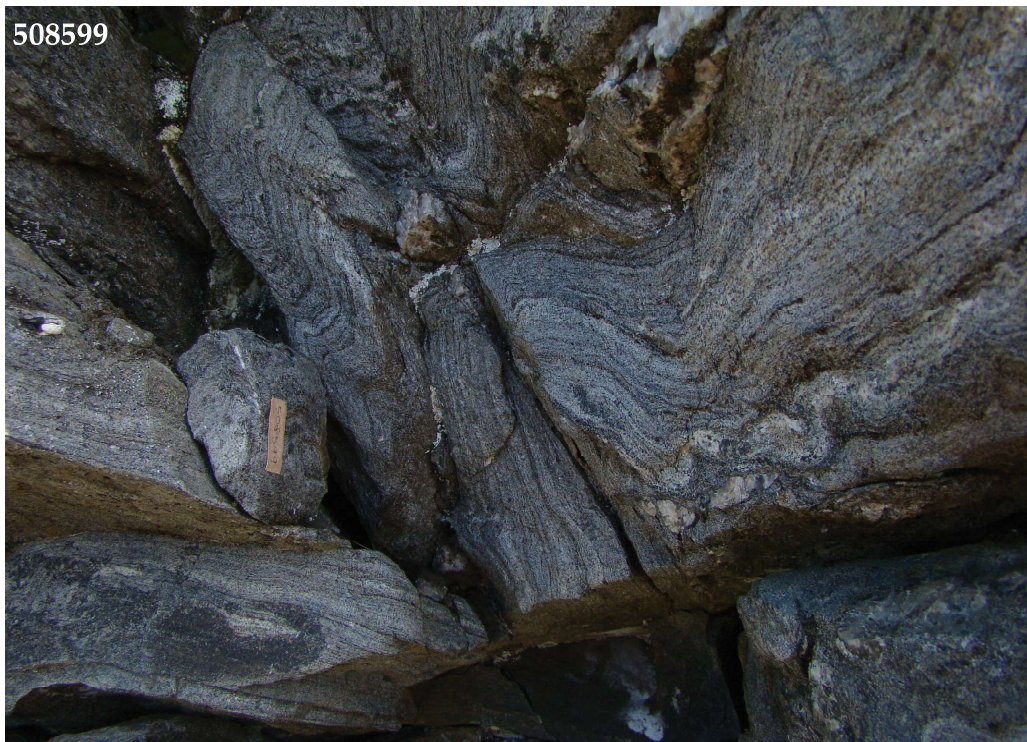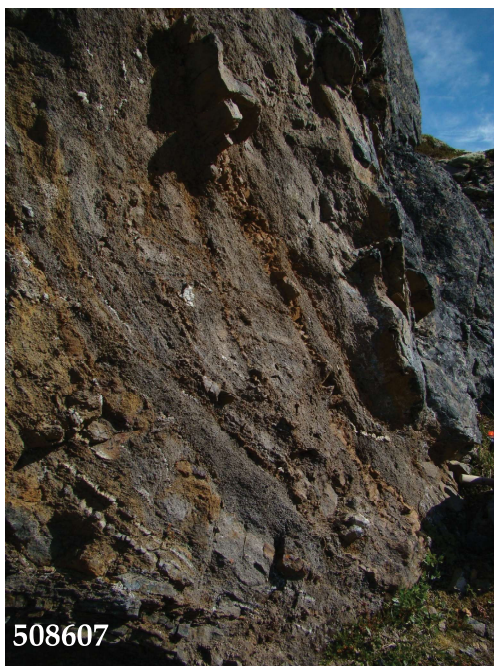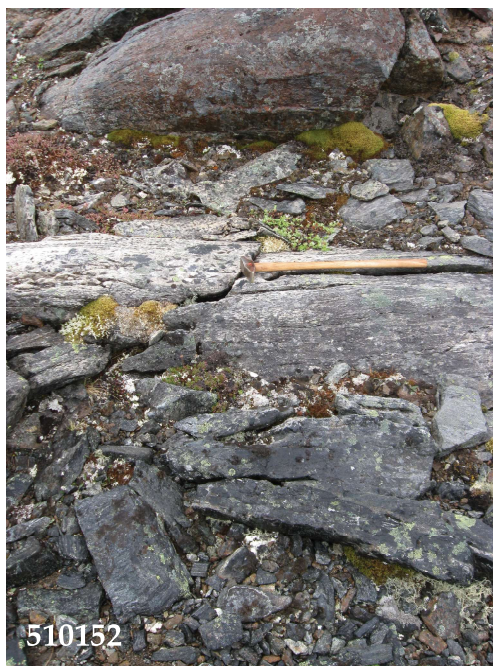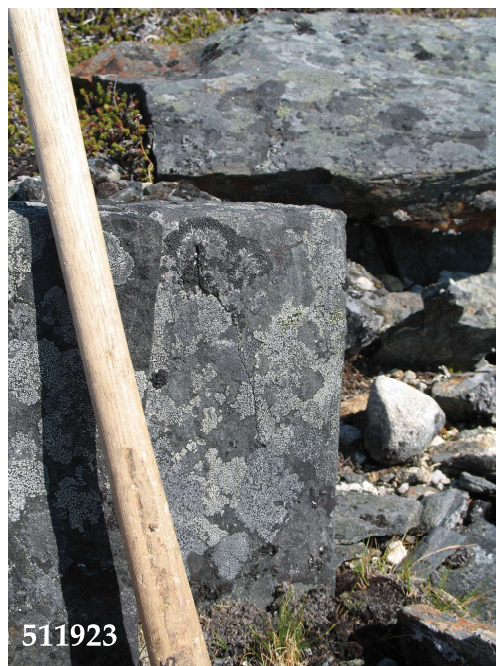

Image 511923 reproduced with permission from GEUS from: Schlatter, D.M. & Stensgaard, B.M. Evaluation of the mineral potential in the Bjørnesund Greenstone Belt combining mineral potential mapping, field work and lithogeochemistry. Danmarks og Grønlands Geologiske Undersøgelse Rapport 2012/60, 60 pp.  
Images 521106-521111a-c: Reproduced with permission from GEUS from: Kalvig, P. & Keulen, N. Aktiviteter i Rubinprojektet, 2011, Samarbejdsprojekt med Råstofdirektoratet. Danm. Grøn. Geol. Und. Rapport 2011/138, 40pp.



Outcrop and handspecimen images, mineral composition data

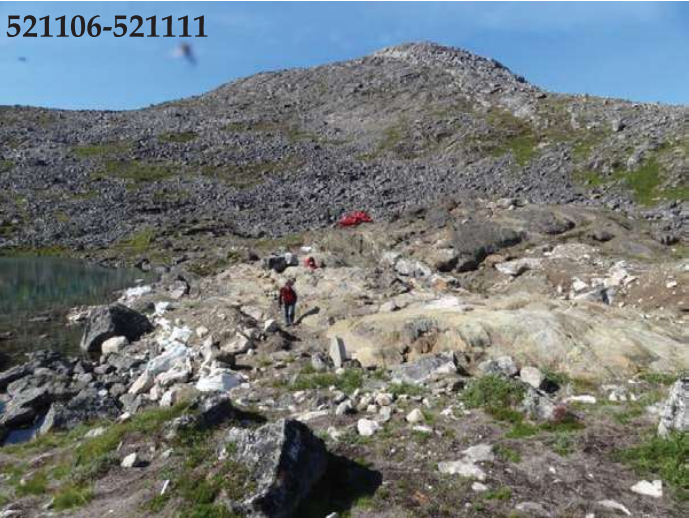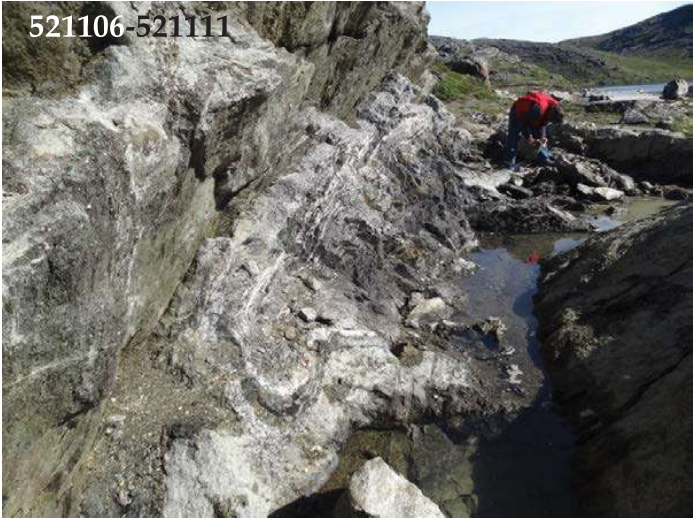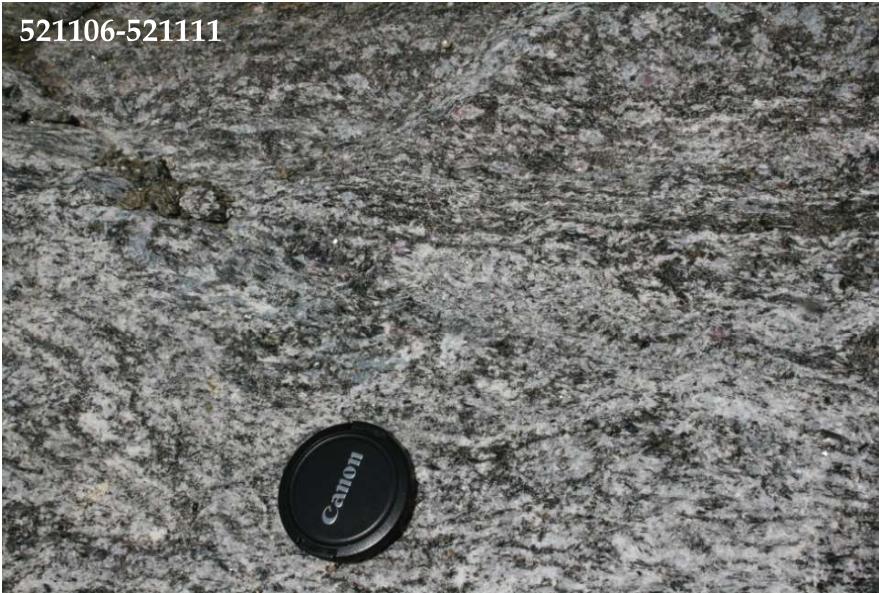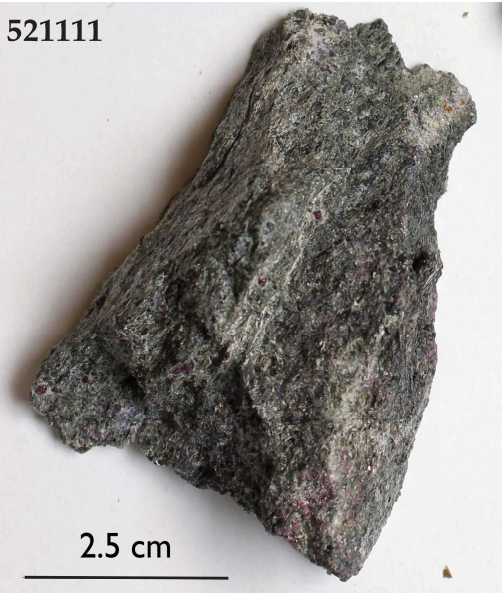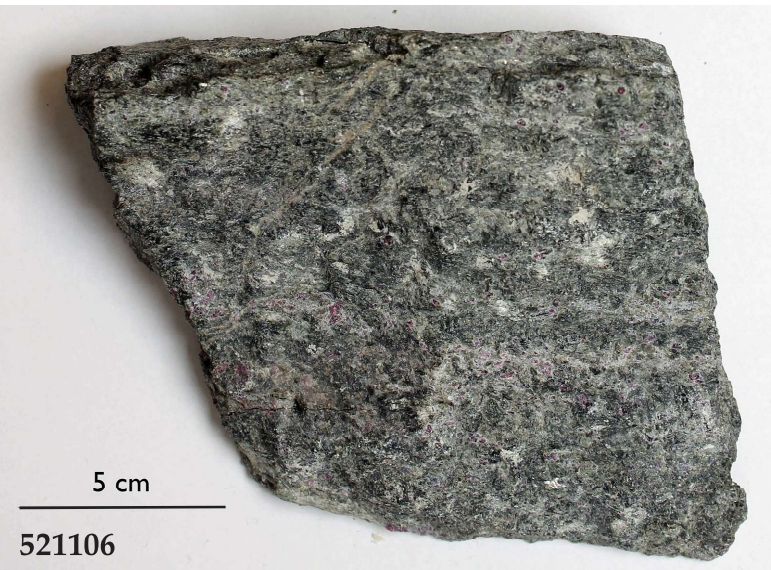

521106



Outcrop and handspecimen images, mineral composition data

| 508599              | Area %   | Weight % | Grain Size |          | Average Composition                                                                |
|---------------------|----------|----------|------------|----------|------------------------------------------------------------------------------------|
|                     |          |          | Grain Size | Std Dev  |                                                                                    |
|                     |          |          | (µm)       | (µm)     |                                                                                    |
| Quartz              | 36.06    | 35.78    | 118.12     | 114.28   | Si 54.89; O 44.8; Al 0.23; Fe 0.04; Mg 0.04; K 0.01;                               |
| Albite              | 34.71    | 34.06    | 74.52      | 60.73    | O 40.87; Si 33.7; Al 14.29; Na 7.65; Ca 3.46; Fe 0.02; Mg 0.02; K 0;               |
| Biotite             | 17.44    | 19.60    | 70.40      | 65.57    | O 37.94; Si 20.73; Fe 13.89; Al 9.93; Mg 9.36; K 8.14;                             |
| Plagioclase         | 4.37     | 4.26     | 22.32      | 7.35     | O 40.61; Si 33.3; Al 13.97; Na 6.6; Ca 5.4; Fe 0.12; Mg 0.01;                      |
| Pyroxene            | 2.70     | 3.33     | 57.88      | 53.66    | O 38.67; Si 25.28; Fe 12.35; Ca 10.54; Mg 8.54; Al 4.57; Na 0.06;                  |
| Calcite             | 0.74     | 0.75     | 37.49      | 36.59    | Ca 49.87; O 49.23; Fe 0.57; Mg 0.27; Mn 0.06;                                      |
| IronOxide           | 0.69     | 1.30     | 27.12      | 17.11    | Fe 53.99; O 41.02; Si 4.02; S 0.97;                                                |
| Garnet              | 0.15     | 0.23     | 20.00      | 0.00     | O 40.01; Si 18.92; Fe 12.82; Al 11.53; Ca 10.1; Mg 6.55; Na 0.09;                  |
| Cummingtonite       | 0.13     | 0.18     | 21.17      | 4.85     | O 41.14; Si 22.57; Fe 13.76; Al 12.12; Mg 10.05; Na 0.26; K 0.1;                   |
| Chlorite            | 0.11     | 0.13     | 20.00      | 0.00     | O 45.83; Si 25.52; Al 19.68; Fe 6.18; Mg 2.3; K 0.49;                              |
| Pyrite              | 0.08     | 0.14     | 27.49      | 10.35    | Fe 67.92; S 32.08;                                                                 |
| 508607              | Area %   | Weight % | Grain Size |          | Average Composition                                                                |
|                     |          |          | Grain Size | Std Dev  |                                                                                    |
|                     |          |          | (µm)       | (µm)     |                                                                                    |
| Quartz              | 35.80    | 34.69    | 104.86     | 102.39   | Si 55.64; O 44; Al 0.28; Mg 0.04; Fe 0.04; K 0.01;                                 |
| Anorthite           | 30.81    | 31.10    | 104.12     | 89.87    | O 38.75; Si 24.28; Al 20.82; Ca 15.34; Na 0.79; Fe 0.02; K 0;                      |
| Biotite             | 9.56     | 10.49    | 52.02      | 45.54    | O 38.34; Si 21.23; Al 11.69; Fe 10.97; Mg 10.63; K 7.13;                           |
| Anthophyllite       | 9.30     | 10.82    | 58.15      | 49.98    | O 38.4; Si 27.52; Fe 19.22; Mg 12.88; Al 1.96; Ca 0.01; Na 0; K 0;                 |
| Garnet              | 5.07     | 7.23     | 59.81      | 59.33    | O 35.17; Fe 26.44; Si 19.62; Al 13.1; Mg 3.4; Ca 2.26; Na 0.01;                    |
| Cummingtonite       | 1.87     | 2.57     | 23.70      | 11.63    | O 39.5; Si 20.28; Fe 17.78; Al 13.05; Mg 9.1; Ca 0.23; K 0.03; Mn 0.02; Na 0.01;   |
| Chlorite            | 0.51     | 0.56     | 20.30      | 2.48     | O 44.98; Si 22.66; Al 19.95; Fe 8.14; Mg 3.93; K 0.34;                             |
| Ilmenite            | 0.43     | 0.76     | 41.47      | 28.24    | Ti 36.09; Fe 35.69; O 28.22;                                                       |
| Plagioclase         | 0.43     | 0.41     | 20.36      | 2.70     | O 41.46; Si 27.79; Al 18.61; Ca 8.06; Na 4.02; Fe 0.04; Mg 0.01;                   |
| IronOxide           | 0.25     | 0.47     | 38.82      | 34.25    | Fe 59.95; O 35.67; Si 2.45; S 1.93;                                                |
| Pyrite              | 0.14     | 0.25     | 32.72      | 16.18    | Fe 66.74; S 33.26;                                                                 |
| 510512              | Area %   | Weight % | Grain Size |          | Average Composition                                                                |
|                     |          |          | Grain Size | Std Dev  |                                                                                    |
|                     |          |          | (µm)       | (µm)     |                                                                                    |
| Anorthite           | 58.04    | 54.99    | 168.32     | 168.09   | O 38.76; Si 25.42; Al 20.24; Ca 13.92; Na 1.64; Fe 0.02; K 0;                      |
| Hornblende          | 28.86    | 32.76    | 73.59      | 87.11    | O 39.67; Si 23.09; Al 11; Ca 10.08; Mg 9.15; Fe 6.79; Na 0.22;                     |
| Chromite            | 6.26     | 7.52     | 90.94      | 87.54    | O 28.59; Fe 28.18; Cr 25.43; Al 17.67; Si 0.14;                                    |
| Plagioclase         | 2.42     | 2.16     | 24.07      | 11.68    | O 40.75; Si 26.9; Al 19.24; Ca 8.79; Na 4.18; Fe 0.1; Mg 0.03; K 0.01;             |
| weathered anorthite | 1.34     | 1.27     | 20.40      | 2.81     | O 40.33; Si 25.88; Al 20.44; Ca 11.73; Na 0.85; Mg 0.51; Fe 0.24;                  |
| Cummingtonite       | 0.32     | 0.42     | 24.50      | 12.39    | O 43.08; Si 16.89; Mg 15.54; Al 13.75; Fe 10.68; K 0.04; Ca 0.02;                  |
| Prehnite            | 0.20     | 0.19     | 20.00      | 0.00     | O 40.69; Si 29.34; Al 19.37; Ca 8.97; Na 1.56; Fe 0.04; Mg 0.02;                   |
| Epidote             | 0.12     | 0.14     | 20.00      | 0.00     | O 41.35; Si 21.62; Ca 15.61; Fe 11.47; Al 9.96;                                    |
| Quartz              | 0.10     | 0.09     | 21.42      | 5.34     | O 61.66; Si 36.77; Al 1.05; Mg 0.51;                                               |
| Albite              | 0.10     | 0.09     | 21.42      | 5.34     | O 40.28; Si 32.58; Al 15.6; Na 7.34; Ca 3.91; Mg 0.29;                             |
| 511923              | Area %   | Weight % | Grain Size |          | Average Composition                                                                |
|                     |          |          | Grain Size | Std Dev  |                                                                                    |
|                     |          |          | (µm)       | (µm)     |                                                                                    |
| FerroAmphibole      | 47.60289 | 50.93242 | 73.96491   | 232.8628 | O 36.48; Si 22.4; Fe 15.87; Ca 12.5; Mg 6.77; Al 5.88; Na 0.09; K 0;               |
| Hornblende          | 20.86204 | 22.32121 | 31.24033   | 30.65479 | O 36.19; Si 23.03; Fe 13.6; Ca 11.44; Mg 8.42; Al 6.98; Na 0.34; K 0;              |
| Anorthite           | 12.84101 | 11.49093 | 52.54893   | 59.30429 | O 39.09; Si 25.67; Al 19.31; Ca 12.37; Na 3.52; Fe 0.03; Mg 0; K 0;                |
| Plagioclase         | 5.91275  | 4.984366 | 22.10174   | 19.15307 | O 39.5; Si 27.6; Al 17.54; Ca 9.13; Na 5.9; Fe 0.29; Mg 0.02; K 0.01;              |
| Quartz              | 5.880862 | 5.052821 | 31.08847   | 30.03436 | Si 55.49; O 43.45; Al 0.45; Fe 0.4; Mg 0.21; K 0.01;                               |
| Zoisite             | 1.23586  | 1.322301 | 30.64872   | 34.65783 | O 41.1; Ca 22.27; Si 19.35; Al 17.28;                                              |
| Albite              | 1.062521 | 0.90258  | 20.42543   | 22.5178  | O 40.33; Si 32.61; Al 14.78; Na 8.7; Ca 3.5; Fe 0.03; Mg 0.03; K 0.01;             |
| Garnet              | 0.611184 | 0.77283  | 11.68365   | 4.989052 | O 38.35; Fe 20.24; Si 17.18; Al 11.51; Mg 7.3; Ca 5.28; Na 0.14; K 0;              |
| Ilmenite            | 0.371208 | 0.577704 | 24.34616   | 18.04262 | Ti 38.95; Fe 33.84; O 27.21;                                                       |
| Ankerite            | 0.35649  | 0.358308 | 10.5318    | 2.641227 | O 51.89; Ca 20.87; Fe 18.99; Mg 8.25;                                              |
| Pale orthoamphibole | 0.261644 | 0.271461 | 15.97996   | 11.85089 | O 39.18; Fe 22.14; Al 13.31; Si 13.04; Mg 12.25; Na 0.05; Ca 0.03; K 0.01;         |
| Sphene              | 0.167616 | 0.190209 | 15.98123   | 11.07173 | O 37.96; Ti 24.69; Ca 23.37; Si 13.98;                                             |
| Cummingtonite       | 0.155351 | 0.188883 | 11.34868   | 4.026234 | O 39.33; Fe 20.28; Si 16.53; Al 12.98; Mg 9.29; Ca 1.03; Na 0.55;                  |
| Apatite             | 0.134501 | 0.137804 | 14.47633   | 7.442685 | Ca 44.63; O 38.77; P 16.52; Cl 0.08;                                               |
| Pseudobrookite      | 0.122237 | 0.190235 | 16.965     | 12.23911 | Ti 42.71; O 37.6; Fe 19.69;                                                        |
| 521106              | Area %   | Weight % | Grain Size |          | Average Composition                                                                |
|                     |          |          | Grain Size | Std Dev  |                                                                                    |
|                     |          |          | (µm)       | (µm)     |                                                                                    |
| Pale orthoamphibole | 59.71596 | 61.27287 | 140.0007   | 371.6429 | O 37.49; Si 24.31; Mg 17.43; Al 13.64; Fe 6.53; Na 0.56; Ca 0.03; K 0.01; Mn 0.01; |
| Biotite             | 9.665579 | 9.29773  | 57.35854   | 111.7215 | O 38.48; Si 21.74; Mg 17.03; Al 13.2; K 7.66; Fe 1.9;                              |
| Chlorite            | 9.279201 | 8.926056 | 16.98913   | 45.25022 | O 37.44; Si 27.04; Al 22.62; Mg 11.03; Fe 1.6; Ca 0.13; K 0.08; Na 0.07;           |
| Corundum            | 7.519942 | 7.233751 | 318.3211   | 420.7831 | Al 63.38; O 36.37; Si 0.2; Fe 0.02; Ca 0.01; Na 0.01; K 0; Mg 0;                   |
| Cummingtonite       | 6.076791 | 7.306903 | 14.71464   | 8.73763  | O 37.19; Si 23.94; Mg 16.99; Al 13.59; Fe 6.41; Ca 1.35; Na 0.52; Mn 0.01; K 0;    |
| Sapphirine          | 2.566964 | 2.469272 | 102.9857   | 180.348  | Al 43.23; O 35.17; Mg 12.77; Si 7.03; Fe 1.76; Ca 0.03; Na 0.01; K 0;              |
| Chlorite            | 1.35041  | 1.299017 | 11.76738   | 5.172373 | O 32.35; Si 31.52; Al 15.06; Mg 12.55; Fe 6.16; Ca 2.14; Na 0.15; K 0.07;          |
| Garnet              | 0.536131 | 0.670445 | 10.58391   | 2.761698 | O 35.75; Si 23.96; Mg 15.36; Al 14.47; Fe 7.39; Ca 2.82; Na 0.26; K 0;             |
| Hornblende          | 0.522834 | 0.55323  | 24.23036   | 35.13456 | O 37.45; Si 23.93; Mg 12.23; Ca 11.82; Al 10.79; Fe 3.44; Na 0.34; K 0;            |
| Anorthite           | 0.304408 | 0.269397 | 107.2395   | 170.4246 | O 37.61; Al 22.16; Si 21.62; Ca 18.2; Na 0.4; Fe 0.01; K 0;                        |
| 521111              | Area %   | Weight % | Grain Size |          | Average Composition                                                                |
|                     |          |          | Grain Size | Std Dev  |                                                                                    |
|                     |          |          | (µm)       | (µm)     |                                                                                    |
| Pale othoamphibole  | 52.00148 | 54.33953 | 129.378    | 318.286  | O 42.18; Si 25.06; Mg 14.7; Al 12.14; Fe 5.64; Ca 0.16; Na 0.08; Mn 0.02; K 0.02;  |
| Biotite             | 24.33754 | 23.8423  | 108.7797   | 200.2108 | O 41.97; Si 22.57; Mg 14.96; Al 11.63; K 7.51; Fe 1.35;                            |
| Corundum            | 10.88616 | 10.66464 | 255.2314   | 342.5348 | Al 60.43; O 39.22; Si 0.22; Ca 0.03; Fe 0.03; Na 0.03; K 0.02; Mg 0.02;            |
| Sapphirine          | 6.050846 | 5.927719 | 149.6582   | 212.8313 | Al 40.44; O 39.73; Mg 12.16; Si 6.54; Fe 1.04; Ca 0.05; Na 0.02; K 0.02;           |
| Cordierite          | 2.657312 | 2.299528 | 75.13865   | 119.5024 | O 42.12; Si 26.94; Al 22.33; Mg 8.43; Fe 0.09; Ca 0.05; K 0.02; Na 0.01;           |
| Anorthite           | 1.428846 | 1.28779  | 149.1862   | 183.0565 | O 40.31; Si 22.57; Al 20.07; Ca 16.55; Na 0.43; Mg 0.03; Fe 0.02; K 0.01;          |
| Chlorite            | 0.778836 | 0.762987 | 22.8162    | 9.606928 | O 41.96; Si 23.86; Al 21.84; Mg 9.41; Fe 1.99; K 0.89; Ca 0.04; Na 0.01;           |
| Hornblende          | 0.312037 | 0.336256 | 35.68912   | 46.02404 | O 42.27; Si 24.27; Ca 11.01; Mg 10.55; Al 9.7; Fe 2.15; Na 0.05; K 0.01;           |
| Magnesite           | 0.100497 | 0.098452 | 45.31817   | 41.03339 | O 52.92; Mg 37.74; Fe 7.43; Al 1.3; Ca 0.26; Si 0.26; Mn 0.04; K 0.03; Na 0.01;    |
